# Supplementary material for: Using Whole Breast Ultrasound Tomography to Improve Breast Cancer Risk Assessment: A Novel Risk Factor Based on the Quantitative Tissue Property of Sound Speed
Source: PubMed Central journal article supplement (PMC7074100; doi:10.3390/jcm9020367), 2020-01-29
Supplement: jcm-09-00367-s001.pdf [file jcm-09-00367-s001.pdf]

**Supplementary Table S1.** Distribution of risk factors by case-control status among women undergoing ultrasound tomography, Detroit, MI.

|                                                               | Case (N = 61)     |      | Comparison (N = 165) |       | p-Value * |
|---------------------------------------------------------------|-------------------|------|----------------------|-------|-----------|
|                                                               | N                 | %    | N                    | %     |           |
| Age, years                                                    |                   |      |                      |       |           |
| ≤50                                                           | 29                | 47.5 | 77                   | 46.7  | 0.91      |
| >50                                                           | 32                | 52.5 | 88                   | 53.3  |           |
| Median (Range)                                                | 50.6 (30.2, 69.1) |      | 51.1 (32.7, 69.2)    |       | 0.66 †    |
| Race                                                          |                   |      |                      |       |           |
| White                                                         | 21                | 34.4 | 51                   | 30.9  | 0.08      |
| Black                                                         | 34                | 55.7 | 109                  | 66.1  |           |
| Other                                                         | 6                 | 9.8  | 5                    | 3.0   |           |
| BMI, kg/m <sup>2</sup>                                        |                   |      |                      |       |           |
| <25                                                           | 15                | 24.6 | 36                   | 22.0  | 0.91      |
| 25–30                                                         | 16                | 26.2 | 46                   | 28.1  |           |
| 30+                                                           | 30                | 49.2 | 82                   | 50.0  |           |
| Education                                                     |                   |      |                      |       |           |
| At most, high school/GED                                      | 19                | 31.2 | 46                   | 27.9  | 0.68      |
| Some college/postsecondary courses                            | 18                | 29.5 | 59                   | 35.8  |           |
| College/graduate school                                       | 24                | 39.3 | 60                   | 36.4  |           |
| Age at menarche                                               |                   |      |                      |       |           |
| ≤12                                                           | 33                | 54.1 | 94                   | 57.3  | 0.36      |
| 13                                                            | 11                | 18.0 | 38                   | 23.2  |           |
| 14+                                                           | 17                | 27.9 | 32                   | 19.5  |           |
| Age at first birth                                            |                   |      |                      |       |           |
| Nulliparous/≥30                                               | 20                | 32.8 | 54                   | 32.73 | 0.99      |
| <30                                                           | 41                | 67.2 | 111                  | 67.27 |           |
| Menopausal status                                             |                   |      |                      |       |           |
| Premenopausal                                                 | 43                | 70.5 | 93                   | 56.4  | 0.054     |
| Postmenopausal                                                | 18                | 29.5 | 72                   | 43.6  |           |
| Any first degree relative with breast cancer                  |                   |      |                      |       |           |
| No                                                            | 45                | 73.8 | 133                  | 80.6  | 0.26      |
| Yes                                                           | 16                | 26.2 | 32                   | 19.4  |           |
| Time between baseline mammogram and baseline sound speed scan |                   |      |                      |       |           |
| Month, median (Range)                                         | 4.1 (0.5, 13.0)   |      | 1.2 (0.2, 4.3)       |       | <0.0001 † |

BMI: body mass index. \* p-values from Chi-square test except where noted; † Wilcoxon test. n = 1 control was missing BMI

**Supplementary Table S2.** Multivariable odds ratios (OR) and 95% confidence intervals (CIs) for the relation of MPD and VASS with breast cancer risk with and without mutual adjustment.

|                                                     | Separate Risk Associations for<br>MPD and VASS |               |                    | Mutually Adjusted Risk Associations<br>(MPD and VASS in the Same Model) |               |                    |
|-----------------------------------------------------|------------------------------------------------|---------------|--------------------|-------------------------------------------------------------------------|---------------|--------------------|
|                                                     | OR                                             | 95% CI        | p <sub>trend</sub> | OR                                                                      | 95% CI        | p <sub>trend</sub> |
| <b>Models Adjusting for Matching Factors §:</b>     |                                                |               |                    |                                                                         |               |                    |
| Quartiles * of MPD, %                               |                                                |               |                    |                                                                         |               |                    |
| <7.8                                                | Ref                                            |               |                    | Ref                                                                     |               |                    |
| 7.8 to <16.9                                        | 0.82                                           | (0.30, 2.26)  |                    | 0.67                                                                    | (0.23, 1.96)  |                    |
| 16.9 to <30.8                                       | 1.75                                           | (0.70, 4.35)  |                    | 0.82                                                                    | (0.28, 2.40)  |                    |
| ≥30.8                                               | 1.76                                           | (0.71, 4.35)  |                    | 0.51                                                                    | (0.15, 1.74)  |                    |
| TREND (per quartile)                                | 1.27                                           | (0.95, 1.70)  | 0.10               | 0.80                                                                    | (0.54, 1.18)  | 0.26               |
| Quartiles * of VASS,<br>m/s                         |                                                |               |                    |                                                                         |               |                    |
| <1440.6                                             | Ref                                            |               |                    | Ref                                                                     |               |                    |
| 1440.6 to <1445.6                                   | 3.31                                           | (0.85, 12.92) |                    | 3.33                                                                    | (0.85, 13.12) |                    |
| 1445.6 to <1452.8                                   | 5.16                                           | (1.37, 19.40) |                    | 5.77                                                                    | (1.46, 22.77) |                    |
| ≥1452.8                                             | 8.60                                           | (2.33, 31.72) |                    | 12.00                                                                   | (2.64, 54.52) |                    |
| TREND (per quartile)                                | 1.83                                           | (1.32, 2.54)  | 0.0003             | 2.16                                                                    | (1.38, 3.35)  | 0.0006             |
| <b>Models with additional adjustment for BMI †:</b> |                                                |               |                    |                                                                         |               |                    |
| Quartiles * of MPD, %                               |                                                |               |                    |                                                                         |               |                    |
| <7.8                                                | Ref                                            |               |                    | Ref                                                                     |               |                    |
| 7.8 to <16.9                                        | 0.83                                           | (0.30, 2.31)  |                    | 0.66                                                                    | (0.22, 1.94)  |                    |
| 16.9 to <30.8                                       | 1.90                                           | (0.74, 4.88)  |                    | 0.89                                                                    | (0.29, 2.64)  |                    |
| ≥30.8                                               | 2.04                                           | (0.77, 5.42)  |                    | 0.59                                                                    | (0.17, 2.03)  |                    |
| TREND (per quartile)                                | 1.34                                           | (0.98, 1.84)  | 0.07               | 0.84                                                                    | (0.56, 1.26)  | 0.40               |
| Quartiles * of VASS,<br>m/s                         |                                                |               |                    |                                                                         |               |                    |
| <1440.6                                             | Ref                                            |               |                    | Ref                                                                     |               |                    |
| 1440.6 to <1445.6                                   | 3.65                                           | (0.92, 14.48) |                    | 3.69                                                                    | (0.93, 14.75) |                    |
| 1445.6 to <1452.8                                   | 5.75                                           | (1.50, 21.96) |                    | 6.27                                                                    | (1.55, 25.35) |                    |
| ≥1452.8                                             | 12.08                                          | (3.03, 48.18) |                    | 15.20                                                                   | (3.17, 72.84) |                    |
| TREND (per quartile)                                | 2.06                                           | (1.43, 2.96)  | <0.0001            | 2.31                                                                    | (1.46, 3.65)  | 0.0004             |

Quartiles were defined based upon distribution among controls. BMI, body mass index (kg/m<sup>2</sup>); CI, confidence interval; MPD, mammographic percent density; OR, odds ratio; VASS, volume averaged sound speed. § OR and 95% CI were estimated from logistic regression model adjusted for age, race, and menopausal status. † OR and 95% CI were estimated from logistic regression model adjusted for age, race, menopausal status and BMI; *n* = 1 control was missing BMI.
